# Supplementary material for: Clearance of PML/RARA-bound promoters suffice to initiate APL differentiation
Source: Oxford University Press journal article supplement (doi:10.1182/blood-2014-03-561852), 2014-09-26
Supplement: blood-2014-03-561852-1.pdf [file blood-2014-03-561852-1.pdf]

## Clearance of PML/RARA-bound promoters suffice to initiate APL differentiation

by Adeline VITALIANO-PRUNIER, Juliane HALFTERMEYER, Julien ABLAIN,

Aurélien de REYNIES, Laurent PERES, Morgane LE BRAS, Daniel METZGER,

Hugues de THE

| Gene Symbol   | RA<br>4h | OHT<br>4h | RA<br>8h | OHT<br>8h | RA<br>16h | OHT<br>16h | RA<br>4h | OHT<br>4h | RA<br>8h | OHT<br>8h | RA<br>16h | OHT<br>16h |
|---------------|----------|-----------|----------|-----------|-----------|------------|----------|-----------|----------|-----------|-----------|------------|
| Bex6          | 0,23     | 1,06      | 0,50     | 3,30      | 0,18      | 1,99       | 0,28     | 1,20      | 0,14     | 1,22      | 0,10      | 1,31       |
| Steap4        | 0,31     | 0,86      | 0,86     | 3,57      | 0,51      | 1,29       | 0,15     | 1,36      | 0,16     | 1,62      | 0,12      | 1,27       |
| Pgf           | 0,47     | 1,01      | 0,75     | 1,72      | 0,29      | 0,91       | 0,43     | 1,04      | 0,21     | 0,97      | 0,17      | 0,93       |
| Cxcl9         | 0,95     | 0,77      | 0,89     | 1,01      | 0,74      | 0,73       | 1,35     | 1,30      | 0,95     | 0,95      | 0,20      | 0,55       |
| L1cam         | 0,70     | 1,01      | 0,62     | 1,46      | 0,37      | 0,97       | 0,88     | 1,44      | 0,47     | 1,11      | 0,21      | 0,93       |
| Rhov          | 0,42     | 0,65      | 0,68     | 0,91      | 0,42      | 0,63       | 0,38     | 0,79      | 0,38     | 0,75      | 0,24      | 0,57       |
| Slc6a4        | 0,38     | 1,14      | 0,60     | 4,68      | 0,58      | 2,75       | 0,40     | 1,40      | 0,14     | 1,49      | 0,24      | 2,33       |
| ---           | 0,82     | 0,73      | 0,73     | 0,99      | 0,54      | 1,01       | 0,80     | 0,99      | 0,56     | 0,91      | 0,25      | 0,28       |
| Ifit1         | 1,27     | 0,91      | 1,24     | 0,81      | 1,24      | 0,92       | 3,53     | 1,29      | 1,16     | 0,83      | 0,25      | 0,46       |
| Sh2d5         | 0,34     | 0,78      | 0,62     | 1,76      | 0,27      | 0,88       | 0,60     | 1,22      | 0,45     | 1,03      | 0,26      | 1,14       |
| Sla2          | 0,30     | 1,22      | 0,64     | 2,87      | 0,47      | 1,25       | 0,29     | 1,09      | 0,27     | 1,21      | 0,26      | 1,36       |
| Fut7          | 0,81     | 1,00      | 0,66     | 1,81      | 0,53      | 1,70       | 0,57     | 1,31      | 0,28     | 1,34      | 0,26      | 1,28       |
| Fam129b       | 0,31     | 1,14      | 0,64     | 1,81      | 0,27      | 1,32       | 0,27     | 1,07      | 0,37     | 1,08      | 0,26      | 1,31       |
| AI504432      | 0,34     | 1,40      | 0,45     | 2,52      | 0,24      | 1,53       | 0,27     | 1,30      | 0,37     | 1,25      | 0,27      | 1,08       |
| Il12a         | 0,30     | 1,01      | 0,42     | 1,59      | 0,24      | 1,15       | 0,27     | 1,00      | 0,33     | 1,08      | 0,27      | 1,36       |
| Slc24a3       | 0,39     | 0,92      | 0,59     | 2,16      | 0,56      | 1,87       | 0,41     | 0,97      | 0,22     | 1,15      | 0,27      | 1,47       |
| Sytl3         | 0,78     | 0,91      | 0,99     | 0,92      | 0,26      | 0,26       | 0,81     | 0,81      | 0,70     | 0,71      | 0,27      | 0,30       |
| Atp2b4        | 1,51     | 0,91      | 1,00     | 1,28      | 0,29      | 0,82       | 1,40     | 1,09      | 0,63     | 1,04      | 0,28      | 1,05       |
| Nlrc5         | 0,94     | 0,97      | 0,86     | 1,14      | 0,73      | 0,86       | 1,17     | 0,92      | 0,92     | 1,02      | 0,28      | 0,75       |
| ---           | 1,25     | 0,95      | 0,90     | 0,96      | 1,30      | 1,11       | 1,09     | 1,28      | 1,12     | 1,09      | 0,28      | 0,50       |
| Emp1          | 0,79     | 0,87      | 0,89     | 1,14      | 0,73      | 0,92       | 0,83     | 0,91      | 0,40     | 0,89      | 0,28      | 0,96       |
| Klrb1f        | 0,36     | 1,12      | 0,37     | 1,68      | 0,40      | 1,51       | 0,33     | 1,03      | 0,38     | 1,13      | 0,29      | 1,21       |
| P2rx3         | 0,82     | 1,00      | 0,96     | 1,37      | 0,43      | 1,29       | 0,83     | 1,06      | 0,57     | 1,08      | 0,30      | 1,04       |
| Cxcl10        | 0,78     | 0,75      | 0,55     | 0,62      | 0,62      | 0,64       | 1,12     | 0,92      | 1,04     | 1,26      | 0,30      | 1,00       |
| Tmem109       | 0,96     | 0,86      | 0,96     | 1,17      | 0,37      | 0,65       | 0,84     | 0,95      | 0,58     | 0,80      | 0,30      | 0,71       |
| 2610318N02Rik | 0,66     | 0,86      | 0,60     | 1,55      | 0,47      | 1,06       | 0,56     | 0,84      | 0,35     | 1,00      | 0,30      | 0,81       |
| Tnfsf8        | 0,37     | 1,11      | 0,75     | 3,09      | 0,48      | 1,74       | 0,34     | 1,12      | 0,26     | 1,25      | 0,31      | 1,47       |
| Kcnn4         | 0,49     | 0,94      | 0,77     | 1,37      | 0,46      | 1,35       | 0,46     | 0,95      | 0,51     | 1,00      | 0,31      | 1,33       |
| Rtp4          | 1,27     | 1,12      | 1,20     | 1,01      | 0,83      | 0,88       | 2,56     | 1,02      | 1,56     | 1,12      | 0,31      | 0,65       |
| Car5b         | 0,79     | 0,88      | 1,03     | 0,84      | 0,96      | 0,85       | 0,98     | 1,06      | 1,04     | 0,99      | 0,31      | 0,74       |
| 2610318N02Rik | 0,68     | 0,96      | 0,65     | 1,49      | 0,53      | 1,18       | 0,78     | 1,05      | 0,36     | 0,96      | 0,31      | 0,99       |
| Nlrc5         | 0,92     | 1,10      | 0,83     | 1,00      | 0,79      | 1,07       | 1,35     | 1,19      | 0,97     | 1,21      | 0,31      | 0,73       |
| Phgdh         | 0,80     | 0,99      | 0,80     | 1,30      | 0,56      | 1,06       | 1,02     | 1,43      | 0,52     | 1,25      | 0,31      | 0,96       |
| Clec4a1       | 0,87     | 1,02      | 0,90     | 1,08      | 0,55      | 0,93       | 0,45     | 1,01      | 0,52     | 1,25      | 0,32      | 0,75       |
| St8sia5       | 0,28     | 0,96      | 0,42     | 2,24      | 0,22      | 0,85       | 0,40     | 1,04      | 0,25     | 1,06      | 0,32      | 0,71       |
| Gm12250       | 1,15     | 1,02      | 1,01     | 0,90      | 1,16      | 0,98       | 2,62     | 1,12      | 1,72     | 1,01      | 0,32      | 0,57       |
| Sirpb1b       | 0,55     | 0,98      | 0,54     | 1,23      | 0,47      | 1,23       | 0,45     | 1,38      | 0,35     | 1,10      | 0,32      | 1,39       |
| Havcr2        | 0,68     | 0,94      | 0,79     | 1,53      | 0,68      | 1,23       | 0,34     | 0,80      | 0,33     | 1,12      | 0,32      | 1,48       |
| Reep6         | 0,62     | 1,03      | 0,65     | 1,84      | 0,39      | 1,43       | 0,78     | 1,07      | 0,45     | 1,09      | 0,33      | 1,16       |
| Trp53i11      | 1,19     | 0,87      | 1,02     | 0,94      | 0,72      | 0,72       | 0,98     | 0,88      | 0,55     | 1,03      | 0,33      | 0,89       |
| Clec4d        | 0,46     | 1,11      | 0,59     | 1,78      | 0,45      | 1,30       | 0,26     | 0,99      | 0,23     | 1,24      | 0,33      | 1,50       |
| Fpgs          | 0,36     | 0,98      | 0,63     | 1,66      | 0,50      | 0,90       | 0,39     | 1,00      | 0,34     | 0,94      | 0,33      | 0,87       |
| Nlrc5         | 1,01     | 1,04      | 0,98     | 1,11      | 0,77      | 0,99       | 1,34     | 1,09      | 1,00     | 0,95      | 0,33      | 0,88       |
| Cyp21a1       | 1,00     | 1,04      | 1,14     | 1,26      | 0,68      | 0,79       | 0,72     | 1,02      | 0,45     | 0,73      | 0,33      | 0,53       |
| Il12rb2       | 0,57     | 0,81      | 0,80     | 1,54      | 0,33      | 0,59       | 0,52     | 1,03      | 0,48     | 1,04      | 0,33      | 0,72       |
| Acpl2         | 0,73     | 1,02      | 0,61     | 0,81      | 0,68      | 0,91       | 0,78     | 1,17      | 0,58     | 1,03      | 0,34      | 0,86       |
| Dctd          | 0,34     | 0,99      | 0,38     | 2,06      | 0,74      | 1,79       | 0,33     | 1,04      | 0,24     | 1,09      | 0,34      | 0,97       |
| Ifrd2         | 0,47     | 1,01      | 0,59     | 1,82      | 0,58      | 1,07       | 0,49     | 0,95      | 0,26     | 0,95      | 0,34      | 0,90       |
| Naf1          | 0,61     | 0,92      | 0,78     | 1,35      | 0,62      | 0,96       | 0,69     | 1,05      | 0,38     | 0,95      | 0,34      | 0,81       |
| Endod1        | 0,71     | 0,95      | 0,70     | 1,20      | 0,55      | 1,22       | 0,80     | 1,03      | 0,60     | 1,08      | 0,34      | 0,94       |

|               |       |      |       |      |       |      |       |      |       |      |       |      |
|---------------|-------|------|-------|------|-------|------|-------|------|-------|------|-------|------|
| Siglece       | 1,84  | 0,98 | 1,96  | 0,59 | 5,51  | 1,11 | 1,31  | 0,96 | 2,62  | 1,20 | 3,62  | 1,22 |
|               | 0,37  | 0,26 | 4,53  | 1,13 | 0,24  | 1,17 | 0,89  | 1,09 | 1,19  | 0,97 | 3,67  | 0,42 |
| Trib1         | 1,35  | 1,22 | 1,91  | 0,77 | 3,16  | 0,69 | 1,05  | 1,06 | 1,84  | 1,14 | 3,71  | 0,86 |
| Card11        | 1,09  | 0,96 | 1,25  | 1,01 | 1,77  | 1,13 | 1,29  | 1,01 | 1,81  | 1,08 | 3,71  | 1,05 |
| Ceacam18      | 1,41  | 1,11 | 1,58  | 0,87 | 3,54  | 0,62 | 1,47  | 1,23 | 1,95  | 1,05 | 3,71  | 1,03 |
| Ptgs1         | 3,14  | 1,11 | 1,88  | 0,47 | 5,57  | 1,28 | 2,28  | 1,04 | 3,38  | 1,09 | 3,74  | 1,20 |
| Fabp7         | 1,01  | 1,02 | 1,21  | 1,11 | 1,70  | 1,01 | 2,31  | 1,16 | 3,96  | 1,14 | 3,74  | 0,66 |
| Slc22a15      | 3,91  | 1,08 | 3,25  | 0,71 | 4,97  | 1,16 | 3,42  | 1,13 | 3,75  | 1,04 | 3,75  | 1,08 |
| C130050O18Rik | 3,55  | 0,90 | 2,35  | 0,42 | 5,89  | 1,17 | 3,23  | 1,11 | 3,56  | 0,90 | 3,76  | 1,26 |
| Fam102a       | 1,84  | 1,02 | 2,01  | 0,83 | 2,80  | 1,30 | 3,04  | 1,09 | 3,74  | 1,11 | 3,77  | 1,09 |
| Rhobtb1       | 2,10  | 0,97 | 2,22  | 0,61 | 4,30  | 0,88 | 1,25  | 0,84 | 2,89  | 0,85 | 3,87  | 0,83 |
| Cp            | 1,09  | 1,07 | 1,19  | 0,95 | 1,54  | 1,09 | 1,15  | 0,97 | 1,24  | 0,96 | 4,06  | 1,09 |
| Fam20a        | 1,25  | 0,92 | 2,39  | 0,90 | 4,02  | 1,11 | 0,99  | 0,88 | 2,42  | 1,10 | 4,13  | 1,22 |
| Cib3          | 1,26  | 1,06 | 1,55  | 0,81 | 5,52  | 1,07 | 1,10  | 0,83 | 1,40  | 0,99 | 4,22  | 1,49 |
| Ggt1          | 1,69  | 0,87 | 2,27  | 0,67 | 3,24  | 0,65 | 2,33  | 1,07 | 4,19  | 0,88 | 4,23  | 0,71 |
| G0s2          | 3,80  | 1,02 | 2,61  | 0,61 | 3,65  | 1,11 | 3,13  | 1,01 | 3,05  | 0,86 | 4,26  | 1,51 |
| ---           | 0,36  | 0,15 | 8,15  | 1,51 | 0,20  | 0,95 | 0,81  | 0,78 | 1,34  | 1,10 | 4,45  | 0,24 |
| Cxcl3         | 1,22  | 1,03 | 2,04  | 0,69 | 3,82  | 0,91 | 1,27  | 0,81 | 2,50  | 1,01 | 4,48  | 1,14 |
| Asb2          | 2,56  | 1,10 | 3,03  | 0,73 | 3,50  | 0,78 | 3,21  | 1,09 | 6,48  | 1,20 | 4,60  | 0,52 |
| A530064D06Rik | 1,70  | 0,92 | 1,58  | 0,50 | 6,73  | 1,47 | 2,03  | 1,22 | 3,15  | 0,92 | 4,65  | 1,05 |
| Cxcl14        | 1,78  | 1,07 | 1,81  | 0,78 | 2,63  | 0,88 | 3,73  | 1,10 | 5,10  | 0,96 | 4,67  | 0,98 |
| Mmp9          | 2,44  | 1,00 | 2,28  | 0,57 | 8,05  | 1,32 | 2,16  | 1,01 | 2,79  | 0,92 | 4,80  | 1,09 |
| Mdm1          | 3,41  | 0,96 | 3,19  | 0,64 | 5,53  | 0,68 | 3,83  | 1,00 | 4,77  | 0,87 | 5,08  | 0,73 |
| Ston2         | 2,08  | 0,78 | 2,02  | 0,39 | 2,83  | 0,58 | 2,17  | 0,94 | 3,95  | 0,83 | 5,17  | 0,64 |
| Rap1gap2      | 4,03  | 1,00 | 3,32  | 0,52 | 8,30  | 0,88 | 3,90  | 1,04 | 5,26  | 1,12 | 5,22  | 1,04 |
| C630004H02Rik | 3,77  | 1,07 | 3,92  | 0,73 | 7,51  | 1,22 | 4,19  | 1,00 | 5,73  | 1,18 | 5,42  | 1,12 |
| Acp5          | 2,37  | 0,97 | 2,37  | 0,57 | 5,88  | 1,23 | 2,94  | 1,04 | 4,74  | 1,01 | 5,55  | 1,18 |
| Apoc2         | 1,34  | 0,94 | 1,68  | 0,81 | 6,62  | 0,91 | 1,57  | 0,86 | 2,94  | 0,82 | 5,85  | 1,02 |
| Vsnl1         | 2,02  | 0,99 | 3,46  | 0,79 | 5,71  | 1,16 | 2,52  | 0,92 | 2,98  | 1,03 | 6,12  | 1,14 |
| Camkk1        | 6,57  | 1,21 | 3,53  | 0,63 | 6,78  | 1,01 | 4,86  | 1,02 | 5,14  | 0,97 | 6,47  | 1,11 |
| Cass4         | 4,56  | 0,90 | 2,77  | 0,48 | 8,10  | 0,91 | 3,41  | 0,94 | 4,72  | 0,81 | 6,50  | 1,03 |
| Lif           | 3,62  | 1,05 | 3,90  | 0,52 | 7,10  | 0,90 | 3,32  | 0,92 | 5,98  | 1,11 | 6,73  | 0,85 |
| Pmepa1        | 0,96  | 0,93 | 2,17  | 0,88 | 2,69  | 0,93 | 1,76  | 1,00 | 3,90  | 0,91 | 6,81  | 0,99 |
| Grik4         | 1,24  | 0,97 | 2,00  | 0,94 | 4,87  | 0,95 | 1,22  | 0,94 | 2,44  | 1,11 | 6,85  | 1,09 |
| F3            | 5,68  | 1,24 | 3,76  | 0,51 | 6,81  | 1,36 | 5,71  | 1,00 | 7,60  | 0,81 | 7,35  | 0,98 |
| Ltc4s         | 2,01  | 1,04 | 2,59  | 0,74 | 10,13 | 1,42 | 1,30  | 1,02 | 2,44  | 1,02 | 7,36  | 1,42 |
| Gfi1b         | 1,97  | 0,97 | 2,12  | 0,70 | 3,38  | 1,09 | 2,71  | 0,98 | 4,68  | 1,00 | 7,76  | 0,93 |
| Tmem119       | 4,03  | 0,94 | 3,30  | 0,44 | 12,16 | 1,37 | 7,10  | 1,04 | 7,51  | 1,19 | 8,06  | 1,24 |
| Gm5662        | 1,35  | 1,08 | 2,26  | 0,51 | 10,80 | 1,28 | 1,31  | 1,21 | 3,08  | 0,97 | 8,14  | 1,25 |
| Tgm2          | 4,58  | 0,70 | 4,39  | 0,22 | 15,68 | 0,25 | 6,96  | 0,53 | 8,57  | 0,58 | 9,47  | 0,28 |
| Apoc1         | 1,21  | 1,02 | 1,89  | 0,71 | 9,49  | 1,04 | 1,34  | 1,05 | 2,83  | 0,94 | 9,54  | 0,94 |
| Fcgr4         | 9,77  | 0,90 | 3,39  | 0,19 | 15,29 | 0,52 | 12,20 | 1,01 | 14,02 | 0,89 | 11,29 | 0,77 |
| Ablim3        | 1,32  | 0,94 | 3,25  | 0,74 | 12,23 | 0,75 | 1,04  | 0,96 | 3,57  | 1,09 | 12,53 | 0,88 |
| Ccl24         | 2,97  | 0,76 | 4,58  | 0,41 | 37,00 | 0,91 | 8,29  | 1,02 | 13,71 | 0,85 | 13,34 | 0,71 |
| Csn3          | 2,22  | 0,95 | 6,77  | 0,70 | 15,85 | 1,10 | 1,78  | 0,88 | 10,87 | 0,85 | 13,92 | 1,00 |
| Ltbp3         | 11,32 | 1,15 | 4,68  | 0,31 | 15,04 | 0,90 | 7,20  | 0,87 | 15,61 | 1,06 | 17,85 | 1,43 |
| Hic1          | 10,83 | 0,94 | 9,10  | 0,62 | 12,59 | 0,93 | 15,94 | 1,00 | 19,15 | 0,95 | 18,27 | 1,05 |
| Ly6f          | 1,42  | 1,11 | 3,18  | 0,90 | 16,79 | 0,93 | 1,22  | 0,94 | 5,36  | 1,02 | 29,38 | 0,72 |
| Serpine1      | 16,66 | 0,93 | 16,34 | 0,71 | 29,70 | 0,85 | 12,68 | 1,09 | 19,35 | 0,92 | 30,69 | 1,10 |
| Ocm           | 10,73 | 0,98 | 9,73  | 0,28 | 66,60 | 0,96 | 12,45 | 0,93 | 33,58 | 0,78 | 46,39 | 0,76 |
| Cyp26a1       | 28,08 | 0,94 | 11,73 | 0,27 | 58,75 | 1,05 | 26,35 | 1,00 | 33,93 | 0,91 | 50,85 | 1,04 |

**Figure S1A: APL cells were treated *ex vivo* with RA or 4-OHT ( $10^{-6}$ M) for the indicated times. List of the 50 top down-regulated and up-regulated genes after 16 h of RA treatment. Data is shown as fold induction over untreated. Two independent experiments are shown.**

| Gene Symbol   | RA<br>4h | OHT<br>4h | RA<br>8h | OHT<br>8h | RA<br>16h | OHT<br>16h | RA<br>4h | OHT<br>4h | RA<br>8h | OHT<br>8h | RA<br>16h | OHT<br>16h |
|---------------|----------|-----------|----------|-----------|-----------|------------|----------|-----------|----------|-----------|-----------|------------|
| Bpil2         | 1,11     | 0,31      | 1,05     | 0,06      | 1,15      | 0,03       | 1,13     | 0,27      | 2,02     | 0,12      | 1,78      | 0,04       |
| Klk1b1        | 0,91     | 0,93      | 0,98     | 0,48      | 0,83      | 0,07       | 0,84     | 0,75      | 0,89     | 0,48      | 1,24      | 0,08       |
| Myl10         | 1,19     | 0,54      | 1,38     | 0,30      | 0,60      | 0,09       | 1,11     | 0,44      | 0,87     | 0,20      | 0,94      | 0,10       |
| ---           | 0,60     | 0,34      | 0,61     | 0,43      | 0,38      | 0,11       | 0,81     | 0,66      | 0,66     | 0,51      | 0,53      | 0,23       |
| Klk1b11       | 0,47     | 0,57      | 0,76     | 0,31      | 0,73      | 0,12       | 0,35     | 0,76      | 0,39     | 0,26      | 0,77      | 0,20       |
| Klk1          | 0,58     | 0,67      | 0,76     | 0,40      | 0,82      | 0,13       | 0,53     | 0,58      | 0,62     | 0,38      | 1,07      | 0,20       |
| Klk1b21       | 0,53     | 0,65      | 0,76     | 0,44      | 0,82      | 0,14       | 0,49     | 0,66      | 0,59     | 0,37      | 0,94      | 0,19       |
| Dennd2a       | 1,06     | 0,59      | 1,11     | 0,22      | 1,08      | 0,15       | 0,83     | 0,67      | 1,12     | 0,43      | 1,70      | 0,21       |
| Lct           | 1,19     | 0,51      | 1,39     | 0,31      | 1,25      | 0,18       | 1,39     | 0,78      | 1,57     | 0,61      | 1,88      | 0,28       |
| Nuak1         | 1,14     | 1,14      | 0,80     | 0,91      | 0,53      | 0,18       | 0,88     | 0,73      | 1,29     | 1,06      | 0,89      | 0,53       |
| Dixdc1        | 1,10     | 0,90      | 1,18     | 0,68      | 0,93      | 0,18       | 1,22     | 0,95      | 1,42     | 0,83      | 1,40      | 0,30       |
| Hsd11b2       | 0,59     | 0,61      | 0,89     | 0,77      | 0,26      | 0,19       | 1,09     | 0,98      | 0,91     | 0,94      | 0,72      | 0,36       |
| Klk1b27       | 0,81     | 0,90      | 0,97     | 0,63      | 0,76      | 0,19       | 0,51     | 0,55      | 0,95     | 0,45      | 1,34      | 0,15       |
| Naaa          | 0,72     | 0,66      | 0,68     | 0,45      | 0,44      | 0,19       | 0,76     | 0,80      | 0,62     | 0,56      | 0,63      | 0,28       |
| Tmem86a       | 1,71     | 0,49      | 1,61     | 0,37      | 1,09      | 0,22       | 1,33     | 0,69      | 1,43     | 0,61      | 1,51      | 0,46       |
| Adrb2         | 1,33     | 0,50      | 1,47     | 0,34      | 1,35      | 0,22       | 1,33     | 0,71      | 2,22     | 0,75      | 2,20      | 0,40       |
| Tshr          | 0,79     | 0,99      | 0,79     | 0,54      | 0,78      | 0,24       | 0,64     | 1,01      | 0,81     | 0,87      | 0,41      | 0,34       |
| Mlph          | 0,55     | 0,69      | 0,74     | 0,66      | 0,35      | 0,24       | 0,82     | 0,92      | 0,76     | 0,68      | 0,70      | 0,39       |
| Socs3         | 0,52     | 0,43      | 0,51     | 0,50      | 0,31      | 0,25       | 0,52     | 0,70      | 0,69     | 0,74      | 0,55      | 0,53       |
| Tgm2          | 4,58     | 0,70      | 4,39     | 0,22      | 15,68     | 0,25       | 6,96     | 0,53      | 8,57     | 0,58      | 9,47      | 0,28       |
| Odz4          | 0,75     | 0,80      | 0,96     | 0,94      | 0,70      | 0,25       | 1,10     | 1,08      | 0,73     | 0,69      | 0,46      | 0,28       |
| Sytl3         | 0,78     | 0,91      | 0,99     | 0,92      | 0,26      | 0,26       | 0,81     | 0,81      | 0,70     | 0,71      | 0,27      | 0,30       |
| Rrp1b         | 0,43     | 0,75      | 0,63     | 1,02      | 0,49      | 0,26       | 0,46     | 0,86      | 0,41     | 0,85      | 0,60      | 0,51       |
| ---           | 0,98     | 1,00      | 0,87     | 0,90      | 0,50      | 0,27       | 0,82     | 0,74      | 0,83     | 0,85      | 0,66      | 0,44       |
| 5430435G22Rik | 0,96     | 0,56      | 0,93     | 0,41      | 0,98      | 0,28       | 1,17     | 0,72      | 1,55     | 0,52      | 1,30      | 0,31       |
| Ccdc85a       | 0,66     | 0,74      | 0,75     | 0,42      | 0,50      | 0,29       | 0,54     | 0,83      | 0,84     | 0,65      | 0,80      | 0,40       |
| Tmem65        | 0,66     | 0,39      | 0,75     | 0,37      | 0,57      | 0,29       | 0,59     | 0,57      | 0,81     | 0,58      | 0,79      | 0,35       |
| Klk1b9        | 0,54     | 0,59      | 1,02     | 0,94      | 0,80      | 0,29       | 0,81     | 0,88      | 0,72     | 0,63      | 0,88      | 0,29       |
| Pla2r1        | 0,95     | 0,70      | 1,06     | 0,60      | 0,59      | 0,29       | 1,12     | 1,05      | 1,50     | 1,04      | 0,67      | 0,43       |
| Nat8l         | 0,56     | 0,64      | 0,79     | 0,65      | 0,46      | 0,30       | 0,77     | 0,87      | 0,80     | 0,67      | 0,71      | 0,35       |
| Rbpms         | 2,00     | 0,62      | 1,96     | 0,31      | 1,83      | 0,31       | 1,83     | 0,99      | 2,96     | 0,67      | 2,18      | 0,54       |
| Als2cl        | 1,39     | 0,67      | 1,24     | 0,49      | 0,82      | 0,32       | 1,30     | 0,73      | 2,01     | 0,61      | 1,43      | 0,35       |
| Sectm1b       | 1,00     | 0,89      | 0,90     | 0,85      | 0,31      | 0,32       | 1,04     | 0,91      | 0,95     | 1,00      | 0,45      | 0,40       |
| Nos1ap        | 0,91     | 0,65      | 1,07     | 0,48      | 0,78      | 0,32       | 0,80     | 0,88      | 0,95     | 0,61      | 0,63      | 0,44       |
| Slc26a9       | 1,88     | 0,53      | 1,38     | 0,29      | 1,62      | 0,32       | 1,67     | 0,53      | 1,55     | 0,51      | 1,57      | 0,41       |
| Fbxo7         | 1,01     | 0,81      | 0,95     | 0,67      | 0,73      | 0,34       | 1,21     | 0,84      | 1,08     | 0,69      | 0,81      | 0,42       |
| Nlrp3         | 0,76     | 0,47      | 0,80     | 0,44      | 0,91      | 0,34       | 0,71     | 0,59      | 0,77     | 0,57      | 0,95      | 0,66       |
| Htra3         | 0,78     | 0,74      | 0,98     | 0,75      | 1,00      | 0,34       | 0,87     | 0,78      | 0,87     | 0,69      | 0,97      | 0,44       |
| Nt5dc3        | 0,88     | 0,77      | 1,04     | 0,70      | 1,10      | 0,34       | 0,87     | 0,99      | 0,92     | 0,85      | 1,05      | 0,60       |
| Thbs1         | 0,54     | 0,36      | 0,69     | 0,16      | 0,86      | 0,35       | 0,35     | 0,52      | 0,51     | 0,28      | 0,90      | 0,45       |
| Fam46c        | 1,22     | 0,80      | 1,72     | 0,60      | 2,79      | 0,36       | 1,19     | 1,00      | 1,86     | 1,01      | 2,80      | 0,61       |
| Mmp19         | 0,80     | 0,65      | 0,96     | 0,50      | 0,52      | 0,36       | 0,84     | 0,65      | 0,88     | 0,47      | 0,57      | 0,39       |
| Dusp22        | 0,73     | 0,78      | 0,90     | 0,71      | 0,97      | 0,37       | 0,91     | 0,91      | 1,14     | 0,92      | 0,85      | 0,44       |
| 1110002B05Rik | 1,02     | 0,83      | 1,02     | 0,62      | 1,28      | 0,37       | 1,06     | 0,93      | 1,16     | 0,92      | 1,43      | 0,56       |
| Slc35e3       | 1,03     | 0,99      | 1,45     | 1,01      | 1,62      | 0,37       | 0,97     | 0,96      | 1,17     | 1,04      | 1,86      | 0,66       |
| Lgals4        | 0,86     | 0,89      | 0,94     | 1,00      | 0,58      | 0,37       | 0,81     | 1,04      | 0,71     | 0,83      | 0,63      | 0,56       |
| Miox          | 1,03     | 0,94      | 1,13     | 0,88      | 1,92      | 0,37       | 1,09     | 1,06      | 0,94     | 0,83      | 1,11      | 0,75       |
| Ptprs         | 4,52     | 0,76      | 2,01     | 0,25      | 3,45      | 0,37       | 4,72     | 1,01      | 4,13     | 0,72      | 2,82      | 0,46       |
| Fzd3          | 2,16     | 0,82      | 2,31     | 0,63      | 2,69      | 0,38       | 2,19     | 1,04      | 2,11     | 0,68      | 3,41      | 0,53       |
| Ccr10         | 0,94     | 0,93      | 1,11     | 1,24      | 0,37      | 0,38       | 0,95     | 1,04      | 0,84     | 1,16      | 0,70      | 0,73       |
| Pilrb2        | 1,05     | 1,11      | 0,85     | 0,87      | 2,42      | 1,68       | 0,98     | 1,03      | 0,97     | 1,12      | 1,86      | 1,45       |
| Wbscr16       | 0,91     | 0,84      | 0,89     | 1,26      | 1,10      | 1,68       | 0,81     | 0,76      | 0,88     | 1,02      | 1,10      | 1,32       |
| ---           | 0,82     | 0,75      | 0,66     | 1,02      | 1,06      | 1,69       | 1,17     | 1,23      | 0,99     | 1,25      | 0,97      | 0,95       |
| Mpeg1         | 1,01     | 0,97      | 1,23     | 0,89      | 2,57      | 1,69       | 0,99     | 1,12      | 0,94     | 0,95      | 1,39      | 1,17       |
| Lefty2        | 1,07     | 1,16      | 0,86     | 0,94      | 1,24      | 1,69       | 0,87     | 1,10      | 1,01     | 1,00      | 1,47      | 1,74       |
| Gtf3c2        | 1,09     | 0,86      | 1,21     | 1,21      | 1,40      | 1,69       | 0,96     | 0,86      | 1,14     | 0,96      | 1,25      | 1,18       |
| ---           | 1,04     | 0,88      | 0,66     | 1,03      | 1,03      | 1,69       | 0,92     | 1,03      | 0,83     | 1,03      | 0,50      | 0,75       |
| Gata2         | 0,33     | 1,11      | 0,90     | 3,56      | 0,44      | 1,70       | 0,59     | 0,93      | 0,61     | 1,33      | 0,64      | 0,99       |
| 5530400C23Rik | 1,00     | 0,96      | 0,97     | 1,08      | 1,02      | 1,70       | 0,69     | 0,82      | 0,86     | 0,90      | 1,91      | 1,63       |
| Clec5a        | 0,80     | 1,06      | 0,87     | 1,09      | 1,32      | 1,70       | 0,67     | 1,00      | 0,85     | 1,09      | 1,14      | 1,18       |

|          |      |      |      |      |       |      |      |      |      |      |      |      |
|----------|------|------|------|------|-------|------|------|------|------|------|------|------|
| Foxred2  | 0,41 | 1,03 | 0,62 | 2,30 | 0,49  | 1,70 | 0,50 | 1,17 | 0,29 | 1,29 | 0,47 | 1,25 |
| ---      | 1,07 | 0,97 | 0,98 | 0,97 | 1,08  | 1,70 | 0,87 | 0,90 | 0,92 | 0,93 | 1,50 | 1,47 |
| Vmn1r222 | 1,02 | 1,12 | 1,11 | 1,03 | 1,03  | 1,70 | 0,87 | 0,89 | 0,96 | 1,02 | 1,71 | 1,86 |
| ---      | 1,17 | 1,02 | 1,24 | 1,19 | 1,09  | 1,70 | 0,82 | 0,86 | 0,95 | 1,00 | 1,33 | 1,19 |
| Fut7     | 0,81 | 1,00 | 0,66 | 1,81 | 0,53  | 1,70 | 0,57 | 1,31 | 0,28 | 1,34 | 0,26 | 1,28 |
| ---      | 1,28 | 1,07 | 0,81 | 0,99 | 1,33  | 1,71 | 0,99 | 0,87 | 1,11 | 1,07 | 0,87 | 0,91 |
| Tcra-V8  | 1,15 | 1,06 | 0,88 | 0,90 | 1,43  | 1,71 | 0,86 | 0,94 | 1,22 | 1,03 | 1,30 | 1,05 |
| ---      | 0,92 | 0,93 | 0,98 | 1,28 | 1,13  | 1,71 | 0,83 | 0,82 | 1,35 | 1,26 | 1,19 | 1,21 |
| Nek6     | 0,37 | 1,05 | 0,58 | 1,78 | 0,71  | 1,71 | 0,39 | 1,02 | 0,47 | 1,03 | 0,73 | 1,18 |
| Slfn1    | 0,66 | 1,14 | 0,90 | 0,98 | 1,76  | 1,74 | 0,50 | 0,96 | 1,00 | 1,11 | 1,41 | 1,33 |
| Tnfsf8   | 0,37 | 1,11 | 0,75 | 3,09 | 0,48  | 1,74 | 0,34 | 1,12 | 0,26 | 1,25 | 0,31 | 1,47 |
| ---      | 1,39 | 1,05 | 1,13 | 1,56 | 0,96  | 1,76 | 0,89 | 1,55 | 0,87 | 1,35 | 0,45 | 0,69 |
| ---      | 1,19 | 0,91 | 0,94 | 1,00 | 1,31  | 1,76 | 0,92 | 1,03 | 0,99 | 1,14 | 0,98 | 0,93 |
| ---      | 0,97 | 0,83 | 0,70 | 0,85 | 1,14  | 1,78 | 0,80 | 0,75 | 1,05 | 1,07 | 1,32 | 1,32 |
| Flnb     | 0,70 | 0,97 | 0,90 | 2,16 | 0,40  | 1,78 | 0,82 | 1,16 | 0,61 | 1,35 | 0,44 | 1,53 |
| Trdn     | 1,43 | 1,39 | 1,02 | 0,93 | 0,82  | 1,78 | 0,79 | 0,84 | 0,96 | 0,86 | 1,54 | 1,68 |
| Pilrb1   | 0,96 | 1,10 | 0,98 | 1,00 | 1,94  | 1,78 | 0,84 | 1,03 | 1,12 | 1,34 | 1,84 | 1,61 |
| Dctd     | 0,34 | 0,99 | 0,38 | 2,06 | 0,74  | 1,79 | 0,33 | 1,04 | 0,24 | 1,09 | 0,34 | 0,97 |
| ---      | 0,77 | 0,66 | 1,06 | 1,25 | 1,50  | 1,79 | 0,71 | 0,75 | 0,99 | 1,11 | 1,15 | 1,20 |
| Cd34     | 0,67 | 0,90 | 0,84 | 2,58 | 0,52  | 1,82 | 0,74 | 1,07 | 0,42 | 1,13 | 0,47 | 1,24 |
| Arl4c    | 0,71 | 1,28 | 0,87 | 1,40 | 1,04  | 1,84 | 0,54 | 1,17 | 0,63 | 1,13 | 0,90 | 1,41 |
| Olf193   | 1,07 | 1,03 | 0,94 | 0,95 | 1,28  | 1,84 | 0,74 | 0,82 | 0,76 | 0,84 | 1,97 | 1,81 |
| Sbpl     | 0,83 | 0,89 | 0,81 | 0,84 | 1,34  | 1,84 | 0,84 | 1,07 | 1,10 | 1,07 | 1,45 | 1,50 |
| Ttyh2    | 1,15 | 1,07 | 0,83 | 1,07 | 1,18  | 1,84 | 1,25 | 0,94 | 0,83 | 1,08 | 0,99 | 1,36 |
| Slc36a2  | 1,28 | 1,22 | 2,45 | 1,36 | 11,05 | 1,85 | 0,92 | 1,31 | 1,40 | 1,24 | 2,99 | 1,74 |
| Amica1   | 0,56 | 1,61 | 0,67 | 1,31 | 0,85  | 1,85 | 0,38 | 1,50 | 0,61 | 1,09 | 0,52 | 1,27 |
| Trem1    | 1,16 | 0,85 | 1,11 | 0,96 | 2,52  | 1,85 | 1,01 | 0,92 | 1,12 | 0,98 | 1,57 | 1,43 |
| ---      | 0,87 | 0,90 | 1,09 | 1,01 | 0,98  | 1,87 | 0,82 | 0,78 | 1,00 | 1,03 | 1,25 | 1,34 |
| Gm5416   | 0,81 | 1,09 | 0,72 | 1,16 | 0,98  | 1,87 | 0,66 | 1,10 | 0,45 | 1,22 | 0,70 | 1,16 |
| ---      | 0,97 | 1,03 | 0,93 | 1,04 | 1,06  | 1,87 | 0,81 | 0,87 | 0,93 | 0,88 | 1,71 | 1,59 |
| Slc24a3  | 0,39 | 0,92 | 0,59 | 2,16 | 0,56  | 1,87 | 0,41 | 0,97 | 0,22 | 1,15 | 0,27 | 1,47 |
| Raet1d   | 1,16 | 1,38 | 0,84 | 1,28 | 1,49  | 1,93 | 0,68 | 1,19 | 0,76 | 1,20 | 0,71 | 1,32 |
| ---      | 0,92 | 1,06 | 0,83 | 1,74 | 0,69  | 1,97 | 0,77 | 0,99 | 0,51 | 1,18 | 1,03 | 1,16 |
| Bex6     | 0,23 | 1,06 | 0,50 | 3,30 | 0,18  | 1,99 | 0,28 | 1,20 | 0,14 | 1,22 | 0,10 | 1,31 |
| Pilra    | 1,12 | 1,21 | 0,84 | 0,94 | 2,52  | 2,01 | 0,76 | 1,14 | 1,00 | 1,31 | 1,42 | 1,25 |
| Adora3   | 0,59 | 1,22 | 0,82 | 1,75 | 0,81  | 2,04 | 0,73 | 1,07 | 0,62 | 1,15 | 0,71 | 1,43 |
| Nrp1     | 0,91 | 1,20 | 1,09 | 1,45 | 1,53  | 2,12 | 0,70 | 1,28 | 0,92 | 1,42 | 0,97 | 1,34 |
| F2rl2    | 0,54 | 1,07 | 0,60 | 1,39 | 0,84  | 2,16 | 0,40 | 0,97 | 0,46 | 1,15 | 0,57 | 1,42 |
| Zfp750   | 0,51 | 1,30 | 0,79 | 2,37 | 0,43  | 2,20 | 0,64 | 1,70 | 0,49 | 1,79 | 0,35 | 2,51 |
| Slc6a4   | 0,38 | 1,14 | 0,60 | 4,68 | 0,58  | 2,75 | 0,40 | 1,40 | 0,14 | 1,49 | 0,24 | 2,33 |

**Figure S1B: APL cells were treated *ex vivo* with RA or 4-OHT ( $10^{-6}$ M) for the indicated times. List of the 50 top down-regulated and up-regulated genes after 16 h of 4-OHT treatment. Data is shown as fold induction over untreated. Two independent experiments are shown.**

| Gene          | RA    | As   | RA    | As   | Gene          | RA   | As   | RA    | As   |
|---------------|-------|------|-------|------|---------------|------|------|-------|------|
| Fcgr4         | 17,79 | 1,89 | 2,61  | 1,40 | Cd300a        | 4,05 | 1,16 | 3,36  | 1,25 |
| Cyp26a1       | 16,96 | 0,88 | 35,37 | 1,03 | Ptafr         | 4,01 | 1,50 | 2,32  | 1,17 |
| Il1f9         | 13,70 | 3,04 | 9,04  | 2,61 | Cd97          | 3,96 | 1,04 | 4,28  | 1,48 |
| Ccrl2         | 10,31 | 1,13 | 4,91  | 1,35 | Slc36a2       | 3,91 | 0,72 | 1,69  | 1,19 |
| Ccl6          | 9,43  | 1,33 | 3,67  | 1,45 | Hck           | 3,90 | 1,20 | 4,60  | 1,60 |
| Slco4c1       | 8,73  | 1,42 | 4,83  | 2,13 | Tiparp        | 3,87 | 1,03 | 1,99  | 0,97 |
| Suox          | 8,28  | 0,75 | 3,48  | 1,05 | Fmo5          | 3,86 | 0,96 | 4,38  | 1,29 |
| Padi4         | 8,09  | 1,38 | 5,95  | 2,01 | Pdha1         | 3,84 | 1,36 | 2,00  | 1,02 |
| F3            | 7,52  | 1,17 | 2,77  | 1,23 | Rhou          | 3,81 | 1,19 | 2,16  | 1,22 |
| Pram1         | 7,27  | 1,43 | 7,96  | 2,30 | 4632428N05Rik | 3,73 | 1,10 | 3,81  | 1,40 |
| Cd200r1       | 7,26  | 1,60 | 3,78  | 0,91 | Trp53inp2     | 3,73 | 0,87 | 3,50  | 1,32 |
| Fzd3          | 6,93  | 0,86 | 3,12  | 1,17 | Dennd2d       | 3,72 | 1,53 | 2,77  | 1,41 |
| Ptgs1         | 6,84  | 1,02 | 7,66  | 1,44 | Baiap2        | 3,70 | 0,91 | 1,58  | 0,86 |
| Mras          | 6,44  | 1,05 | 2,70  | 0,93 | Ccdc80        | 3,69 | 1,15 | 1,55  | 0,77 |
| Adssl1        | 6,26  | 1,30 | 9,94  | 2,31 | Ocm           | 3,65 | 1,07 | 10,12 | 0,90 |
| Mgl1          | 6,25  | 1,05 | 2,78  | 1,18 | Oasl2         | 3,65 | 1,43 | 2,05  | 1,51 |
| Cd300lb       | 6,22  | 1,18 | 4,74  | 1,38 | Ehd1          | 3,63 | 1,13 | 4,34  | 1,48 |
| Ncf1          | 6,14  | 1,31 | 7,52  | 2,02 | Lrrc25        | 3,61 | 1,09 | 3,69  | 1,26 |
| Hsd11b1       | 6,10  | 1,48 | 4,60  | 1,94 | Neurl3        | 3,60 | 1,09 | 1,48  | 0,96 |
| Garnl4        | 6,05  | 0,91 | 4,70  | 1,28 | Acp5          | 3,60 | 0,91 | 2,08  | 1,22 |
| Mgst2         | 6,03  | 0,77 | 2,85  | 1,36 | Fam134b       | 3,53 | 1,18 | 1,82  | 1,38 |
| Ltb4r1        | 6,02  | 1,22 | 4,25  | 1,72 | Rilpl2        | 3,53 | 1,10 | 2,11  | 1,06 |
| Irak2         | 5,94  | 1,15 | 3,42  | 1,31 | Tpcn2         | 3,45 | 1,13 | 2,53  | 1,08 |
| Hic1          | 5,74  | 0,89 | 3,44  | 1,14 | Aldh3b1       | 3,42 | 1,38 | 2,05  | 1,66 |
| Bhlhe40       | 5,68  | 1,84 | 2,81  | 1,04 | Ube2l6        | 3,41 | 1,17 | 4,12  | 1,91 |
| Camkk1        | 5,52  | 1,46 | 3,34  | 1,21 | Cass4         | 3,40 | 1,31 | 3,08  | 0,96 |
| Trem12        | 5,52  | 2,15 | 4,02  | 1,59 | Fut4          | 3,39 | 0,93 | 2,81  | 1,10 |
| B430306N03Rik | 5,49  | 1,18 | 4,89  | 1,48 | Rnd1          | 3,38 | 1,27 | 3,06  | 1,28 |
| Vat1          | 5,32  | 1,22 | 1,88  | 1,23 | Phyh          | 3,34 | 1,59 | 2,68  | 1,29 |
| Enpp5         | 5,23  | 1,01 | 2,65  | 1,31 | Alkbh7        | 3,30 | 1,08 | 1,88  | 0,91 |
| Dhrs3         | 5,14  | 1,07 | 4,53  | 1,16 | Ncf4          | 3,27 | 1,39 | 4,23  | 1,67 |
| G0s2          | 4,98  | 1,04 | 2,34  | 1,09 | LOC100047070  | 3,26 | 1,27 | 1,57  | 1,89 |
| Fcgr3         | 4,93  | 1,91 | 2,62  | 1,54 | Kif21b        | 3,25 | 0,97 | 3,53  | 1,27 |
| Rnasel        | 4,89  | 1,34 | 2,76  | 1,44 | Ipcef1        | 3,24 | 1,05 | 3,21  | 1,55 |
| Cideb         | 4,83  | 0,96 | 3,41  | 1,31 | Acss2         | 3,23 | 0,83 | 2,25  | 1,17 |
| C130050O18Rik | 4,79  | 1,11 | 3,19  | 1,30 | Gm7609        | 3,23 | 1,06 | 1,27  | 1,22 |
| Lct           | 4,68  | 0,86 | 2,53  | 1,14 | Pygl          | 3,19 | 1,28 | 2,48  | 1,27 |
| Stard10       | 4,50  | 0,77 | 4,37  | 1,28 | Tifa          | 3,16 | 0,95 | 2,48  | 1,28 |
| Lair1         | 4,45  | 1,39 | 4,76  | 1,18 | C1rl          | 3,15 | 1,87 | 4,13  | 1,75 |
| Fam20c        | 4,43  | 1,00 | 1,85  | 1,05 | Gm15401       | 3,14 | 0,84 | 2,67  | 1,17 |
| Gm10673       | 4,41  | 1,18 | 4,51  | 1,08 | Stab1         | 3,13 | 1,43 | 1,25  | 0,77 |
| Itgb2         | 4,38  | 1,80 | 5,03  | 1,70 | C1rb          | 3,08 | 2,54 | 1,48  | 1,01 |
| Slc40a1       | 4,26  | 1,05 | 3,05  | 1,53 | BC013712      | 3,08 | 0,86 | 2,86  | 1,13 |

|                      |      |      |      |      |                  |      |      |      |      |
|----------------------|------|------|------|------|------------------|------|------|------|------|
| <b>Tshr</b>          | 4,25 | 0,85 | 4,90 | 2,77 | <b>Tubb6</b>     | 3,07 | 1,93 | 1,86 | 1,06 |
| <b>Enpp4</b>         | 4,12 | 1,19 | 1,57 | 1,11 | <b>Gbp2</b>      | 3,07 | 1,30 | 1,54 | 1,06 |
| <b>Tnfrsf14</b>      | 4,08 | 1,08 | 4,81 | 1,58 | <b>Irf1</b>      | 3,07 | 1,05 | 2,21 | 1,11 |
| <b>2010016I18Rik</b> | 4,07 | 1,10 | 3,09 | 1,27 | <b>Dach1</b>     | 3,06 | 2,14 | 3,08 | 1,64 |
| <b>Nr4a1</b>         | 4,07 | 1,35 | 2,74 | 1,07 | <b>Siglecg</b>   | 3,06 | 0,91 | 2,69 | 1,37 |
| <b>B4galt6</b>       | 4,06 | 1,56 | 2,88 | 2,03 | <b>Trp53inp1</b> | 3,04 | 1,09 | 2,30 | 1,07 |
| <b>Ikbke</b>         | 4,06 | 0,97 | 2,89 | 1,13 | <b>Tmc8</b>      | 3,04 | 1,33 | 2,83 | 1,27 |

**Figure S2. 100 top genes induced by a 12h exposure to RA of murine APLs (935) *in vivo*. Genes are expressed as fold-induction over untreated and listed by decreasing order of induction. Two independent experiments with RA or arsenic are shown. At large, genes activated by RA are also up-regulated by arsenic.**
